# Supplementary material
Source: publisher figshare collection journal article supplement (https://acs.figshare.com/ndownloader/files/4103830)
Supplement: Supplementary file 1 [file 4103830]

## Supporting Information

### Pectin-Cellulose Interactions in *Arabidopsis* Primary Cell Wall by Two-Dimensional Magic-Angle-Spinning Solid-State NMR

Tuo Wang, Olga Zabolina, and Mei Hong

**Table S1.** Two sets of interior cellulose  $^{13}\text{C}$  chemical shifts (ppm) resolved at the 900 MHz NMR.

| Cellulose  | C1    | C2   | C3   | C4   | C5   | C6   |
|------------|-------|------|------|------|------|------|
| Interior 1 | 105.1 | 72.2 | 74.1 | 88.6 | 72.2 | 64.7 |
| Interior 2 | 104.1 | 72.2 | 75.0 | 87.9 | 70.8 | 65.6 |

**Table S2.**  $^{13}\text{C}$  chemical shifts (ppm) of assigned protein residues in *Arabidopsis* primary cell wall. The  $^{13}\text{C}$  chemical shifts are referenced to neat TMS.

| Residue | CO             | C $\alpha$           | C $\beta$            | C $\gamma$   | C $\delta$   | C $\epsilon$ | C $\zeta$            |
|---------|----------------|----------------------|----------------------|--------------|--------------|--------------|----------------------|
| Gly     | 171.9<br>173.3 | 43.5<br>43.5         |                      |              |              |              |                      |
| Hyp     |                |                      |                      | 72.5         | 58.6         |              |                      |
| Lys     |                |                      | 33.7                 |              | 27.5         | 40.1         |                      |
| Pro     |                | 60.0                 | 30.7                 | 25.7         | 48.2         |              |                      |
| Ala     |                | 48.6<br>50.1<br>52.2 | 21.1<br>17.4<br>16.7 |              |              |              |                      |
| Tyr     |                | 54.4                 | 37.8<br>42.0         | 133.8        | 131.1        | 115.3        | 157.2/155.8<br>157.2 |
| Phe     |                | 55.1                 | 36.7                 | 137.0        | 129.2        | 129.2        | 127.0                |
| Ser     |                | 55.9                 | 62.2                 |              |              |              |                      |
| Thr     |                | 58.8                 | 67.5                 | 19.7         |              |              |                      |
| Ile     |                | 57.3                 | 38.8<br>35.6         | 26.1         | 15.6<br>15.6 | 12.6         |                      |
| Leu     |                | 55.3<br>51.2         | 40.1<br>41.5         | 25.3<br>24.3 | 21.1         |              |                      |
| Val     |                |                      | 32.7<br>29.9         | 19.3<br>19.3 |              |              |                      |

**Table S3.** Spin diffusion buildup time constants of polysaccharide cross peaks in primary cell wall.

| ( $\omega_1$ , $\omega_2$ ) (ppm)  | Assignment                                    | $\tau_1$ (ms)  | $\tau_2$ (ms) |
|------------------------------------|-----------------------------------------------|----------------|---------------|
| <b>Interior-interior cellulose</b> |                                               |                |               |
| (89, 65)                           | iC4 – iC6                                     | 10±1.9         |               |
| (65, 89)                           | iC6 – iC4                                     | 29±45          |               |
| (89, 72)                           | iC4 – iC5/iC2, s/G/x/L C2, GA/R C3, Gal/GA C5 | 5.4 ± 1.7      |               |
| (65, 105)                          | iC6 – i/s/Gal/G/L C1                          | 27±3.5         |               |
| (65, 75)                           | iC6 – iC3, sC3/5, Gal C2/3, GC3/5, LC5, x C3  | 15±1.7         |               |
| <b>Interior-surface cellulose</b>  |                                               |                |               |
| (89, 84)                           | iC4 – s/G/A C4                                | 8.1±20 (24%)   | 150±94 (76%)  |
| (89, 62)                           | iC4 – s/G/Gal C6, A/x C5                      | 12±14 (37%)    | 230±130 (63%) |
| (65, 84)                           | iC6 – s/G/A C4                                | 6.3±3.1 (58%)  | 460±380 (42%) |
| <b>Surface-interior cellulose</b>  |                                               |                |               |
| (84, 89)                           | s/G/A C4 – iC4                                | 3.4±2.2 (34%)  | 190±53 (66%)  |
| (84, 65)                           | s/G/A C4 – iC6                                | 2.0±1.6 (27%)  | 150±24 (73%)  |
| (62, 89)                           | s/G/A C6 – iC4                                | 3.5±2.9 (23%)  | 250±50 (77%)  |
| (84, 62)                           | s/G/A C4 – s/G/Gal C6, A/x C5                 | 12±4.2         |               |
| <b>Interior-pectin cellulose</b>   |                                               |                |               |
| (89, 101)                          | iC4 – HGA/R C1                                |                | 200±90        |
| (89, 82)                           | iC4 – A C2                                    | 29±11          |               |
| (89, 99)                           | iC4 – GA/X C1                                 |                | 350±100       |
| (89, 69)                           | iC4 – residual iC5, GA C2, R C5               | 6.7±2.6        |               |
| (65, 101)                          | iC6 – HGA/R C1                                | 5.2±1.1        |               |
| (65,105)                           | iC6 – i/s/Gal/G/L C1                          | 27±3.5         |               |
| (65, 69)                           | iC4 – GA C2, R C5                             |                |               |
| (65, 99)                           | iC4 – GA/X C1                                 | 7.5±1.2        |               |
| <b>Pectin-interior cellulose</b>   |                                               |                |               |
| (99, 89)                           | GA/Xyl C1 – iC4                               |                | 370±190       |
| (82, 89)                           | A C2 – iC4                                    | 1.0±6.1 (37%)  | 510±170 (63%) |
| (101, 65)                          | HGA/Rha C1 – iC6                              | 11±11 (44%)    | 490±550 (56%) |
| <b>Surface-pectin cellulose</b>    |                                               |                |               |
| (84, 101)                          | s/G/A C4 – HGA/R C1                           | 18±3.5         |               |
| (84, 99)                           | s/G/A C4 – GA/X C1                            | 14±2.0         |               |
| (84, 69)                           | s/G/A C4 – GA C2, R C5                        | 1.8±0.70 (64%) | 470± 180(36%) |
| <b>Pectin-surface cellulose</b>    |                                               |                |               |
| (101, 84)                          | HGA/R C1 – s/G/A C4                           | 16±5.8 (69%)   | 540±720 (31%) |
| (99, 84)                           | GA/X C1 – s/G/A C4                            | 3.6±2.9 (39%)  | 350±170 (61%) |
| (80, 84)                           | GA C4/R C2 – s/G/A C4                         | 17±23          |               |
| <b>Pectin-pectin</b>               |                                               |                |               |
| (101, 80)                          | HGA/R C1 – GA C4/ R C2                        | 13±2.6         |               |

|           |                             |         |        |
|-----------|-----------------------------|---------|--------|
| (101, 69) | HGA/R C1 – GA C2/ R C5      | 4.0±0.7 |        |
| (80, 101) | GA C4/ R C2 – HGA/R C1      | 14±1.7  |        |
| (69, 101) | GA C2/ R C5 – HGA/R C1      | 4.0±0.6 |        |
| (101, 54) | HGA/R C1– OCH <sub>3</sub>  |         | 160±40 |
| (54, 101) | OCH <sub>3</sub> – HGA/R C1 |         | 160±25 |

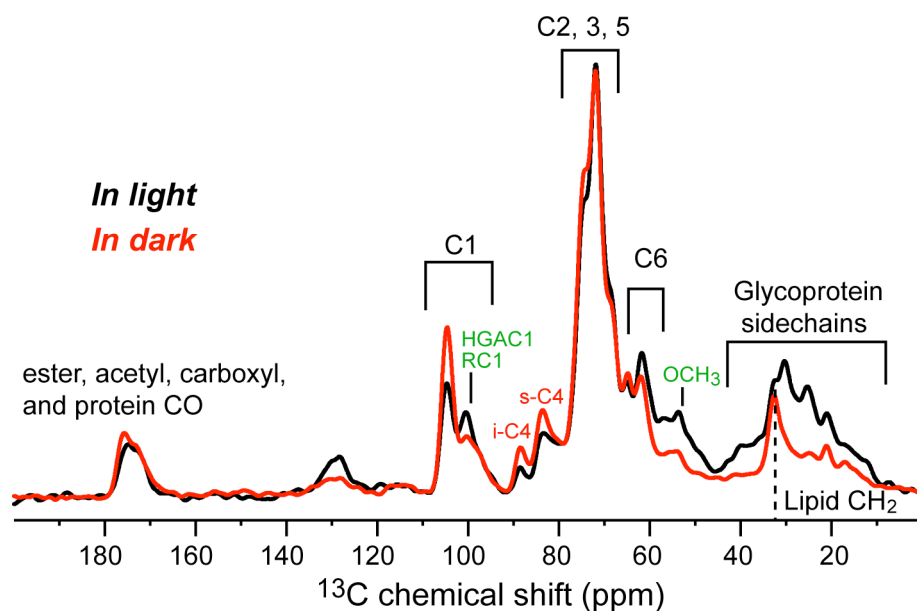

**Figure S1.** 1D  $^{13}\text{C}$  CP-MAS spectra of unlabeled *Arabidopsis* primary cell walls obtained from plants grown in dark (red) versus light (black). The spectra were measured at 253 K under 6 kHz MAS on a 400 MHz NMR spectrometer. Note the similarity of the polysaccharide region of the spectra from 60-110 ppm. Main differences are that the dark-grown cell wall has less protein, less methyl ester (53.5 ppm peak), and slightly less pectins relative to cellulose, as manifested by the weaker 99-ppm peak relative to the 89-ppm peak.

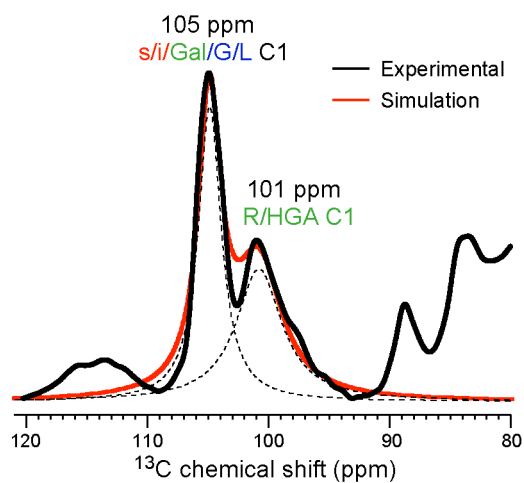

**Figure S2.** Deconvolution of the 105-ppm and 101-ppm peaks in the 1D  $^{13}\text{C}$  CP-MAS spectrum shown in Figure 1. Black: experimental spectrum. Red: sum of the deconvoluted peaks. The deconvolution shows that the upfield wing of the 105-ppm peak contributes only 10% of the total intensity at 101 ppm. For the 105- and 101-ppm peaks, the full width at half maximum are 2.3 and 4.6 ppm, respectively, the relative height is 1 : 0.45 and the relative area is 1 : 0.9.

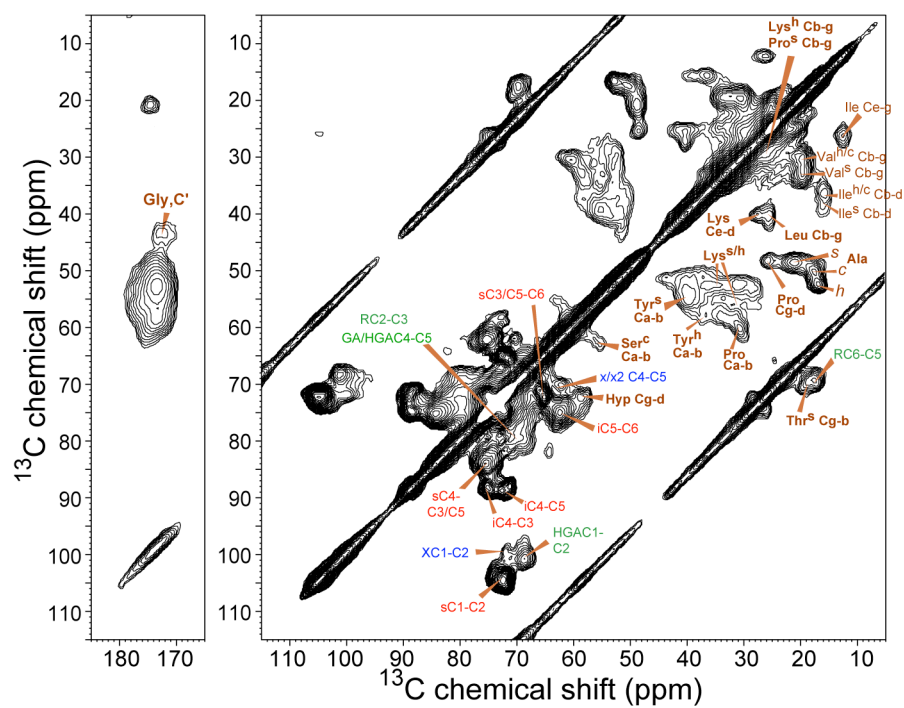

**Figure S3.** 2D  $^{13}\text{C}$  DQ filtered spectrum of  $^{13}\text{C}$ -labeled primary cell wall. A Hyp C $\gamma$ -C $\delta$  cross peak at (72, 59) ppm is detected.

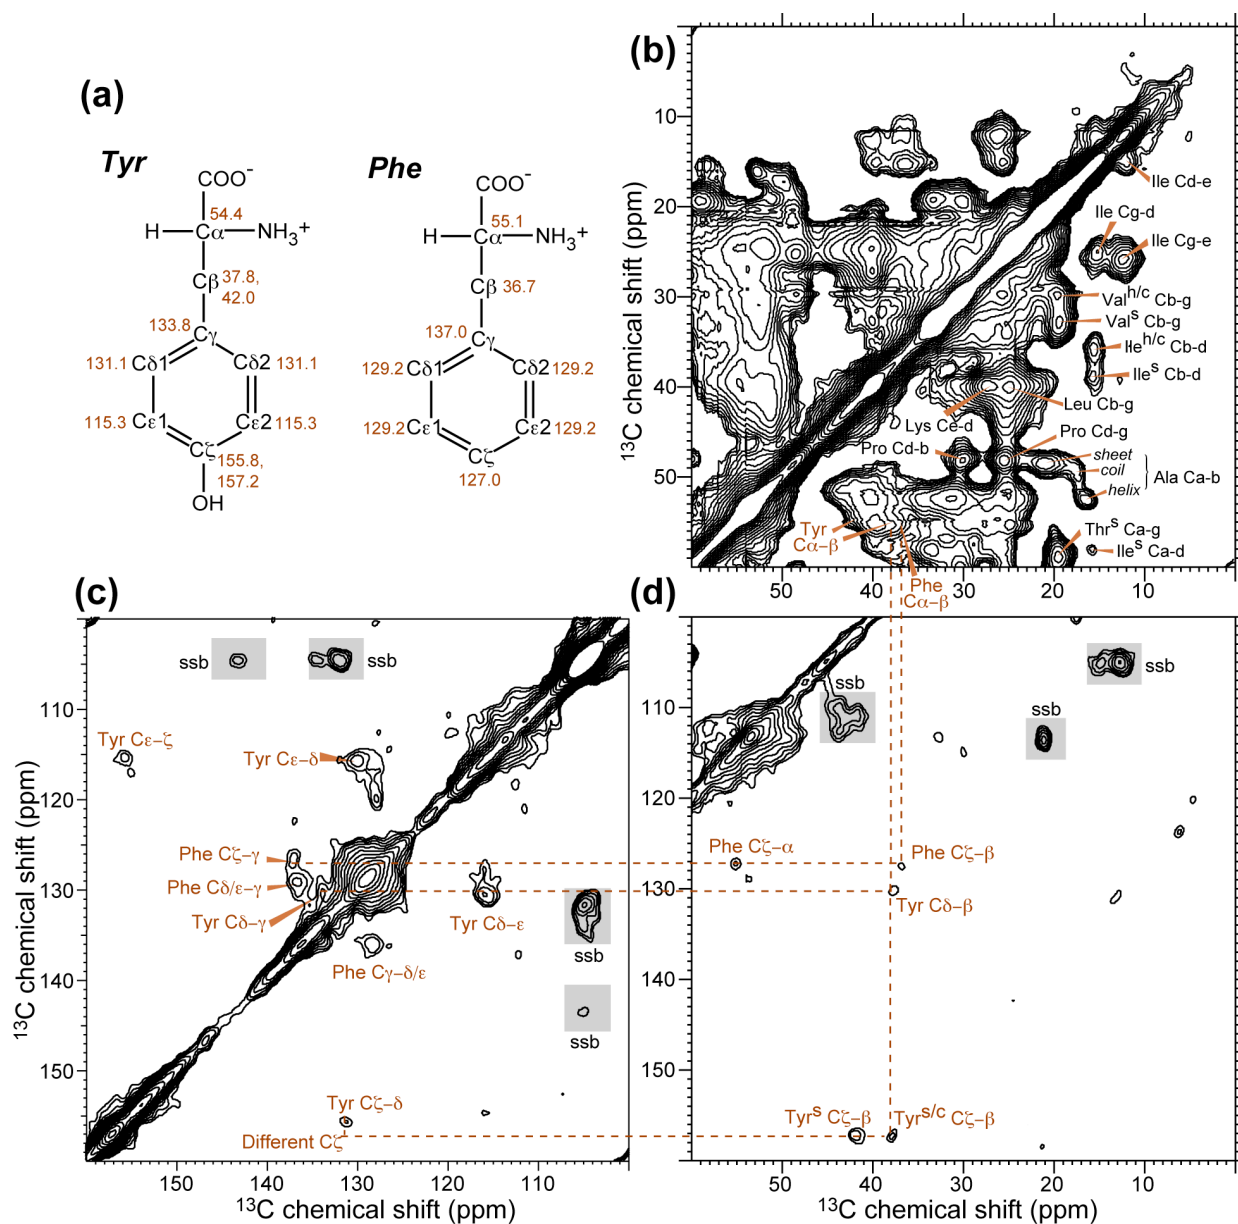

**Figure S4.** Assignment of Tyr and Phe chemical shifts from the 30-ms  $^{13}\text{C}$  PDS spectrum. (a) Summary of the assigned  $^{13}\text{C}$  chemical shifts. (b) Aliphatic region of the 2D spectrum. The area containing the  $\text{C}_\alpha$ - $\text{C}_\beta$  peaks of Tyr and Phe shows significant overlap. (c) Aromatic region of the 2D spectrum, showing the Tyr and Phe spin systems. (d) Correlation between aromatic and aliphatic carbons, where two Tyr  $\text{C}_\zeta$ - $\text{C}_\beta$  peaks are observed.

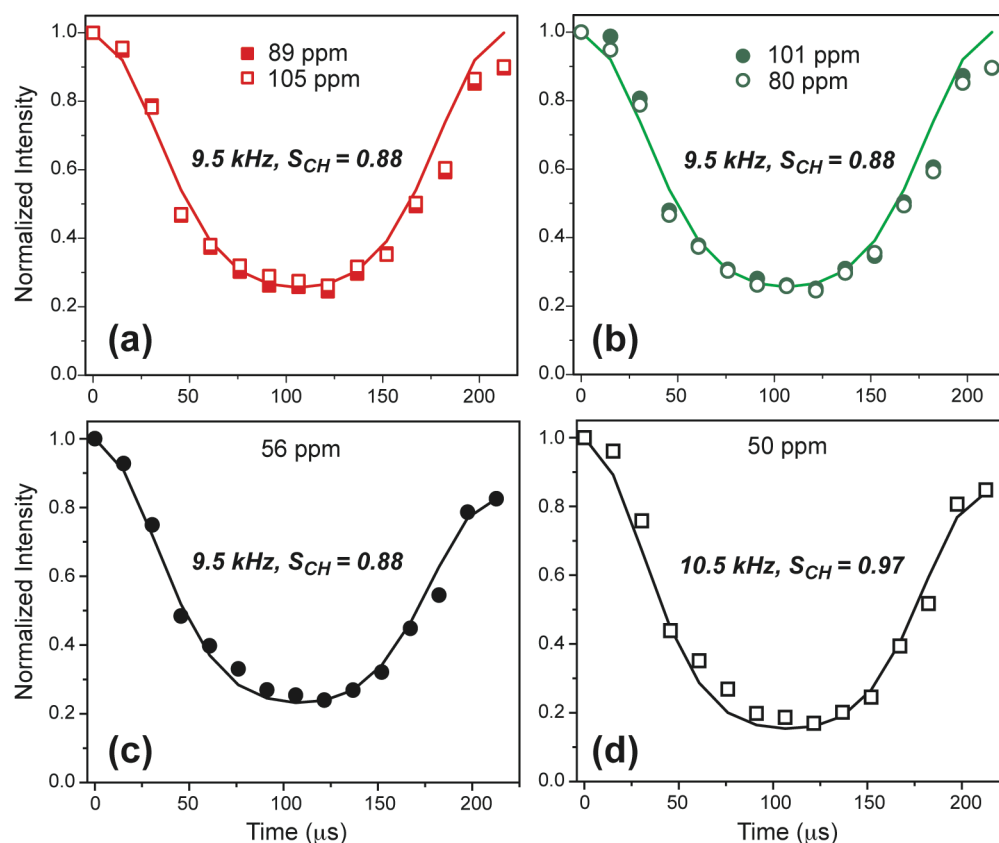

**Figure S5.**  $^{13}\text{C}$ - $^1\text{H}$  DIPSHIFT spectra of the cell wall at 253 K under 4.7 kHz MAS. (a) Cellulose-rich peaks. 89 ppm: iC4; 105 ppm: i/s/G/Gal C1. (b) Predominantly pectin peaks. 101 ppm: Rha and HGA C1; 80 ppm: Rha C2 and GA C4. (c), (d) Typical protein  $\text{C}\alpha$  peaks. 56 ppm: Ser/Phe/Leu  $\text{C}\alpha$ ; 50 ppm: Ala  $\text{C}\alpha$ . For panels (c) and (d), the experimental data show moderate  $T_2$  relaxation, which was simulated using a single exponential decay. The figure shows that cellulose and pectins have similar order parameters  $S_{\text{CH}}$  of 0.88, indicating similar amplitudes of motion, while the proteins are more rigid at this temperature. Therefore, lack of cross peaks must be attributed to long distances rather than molecular motion.



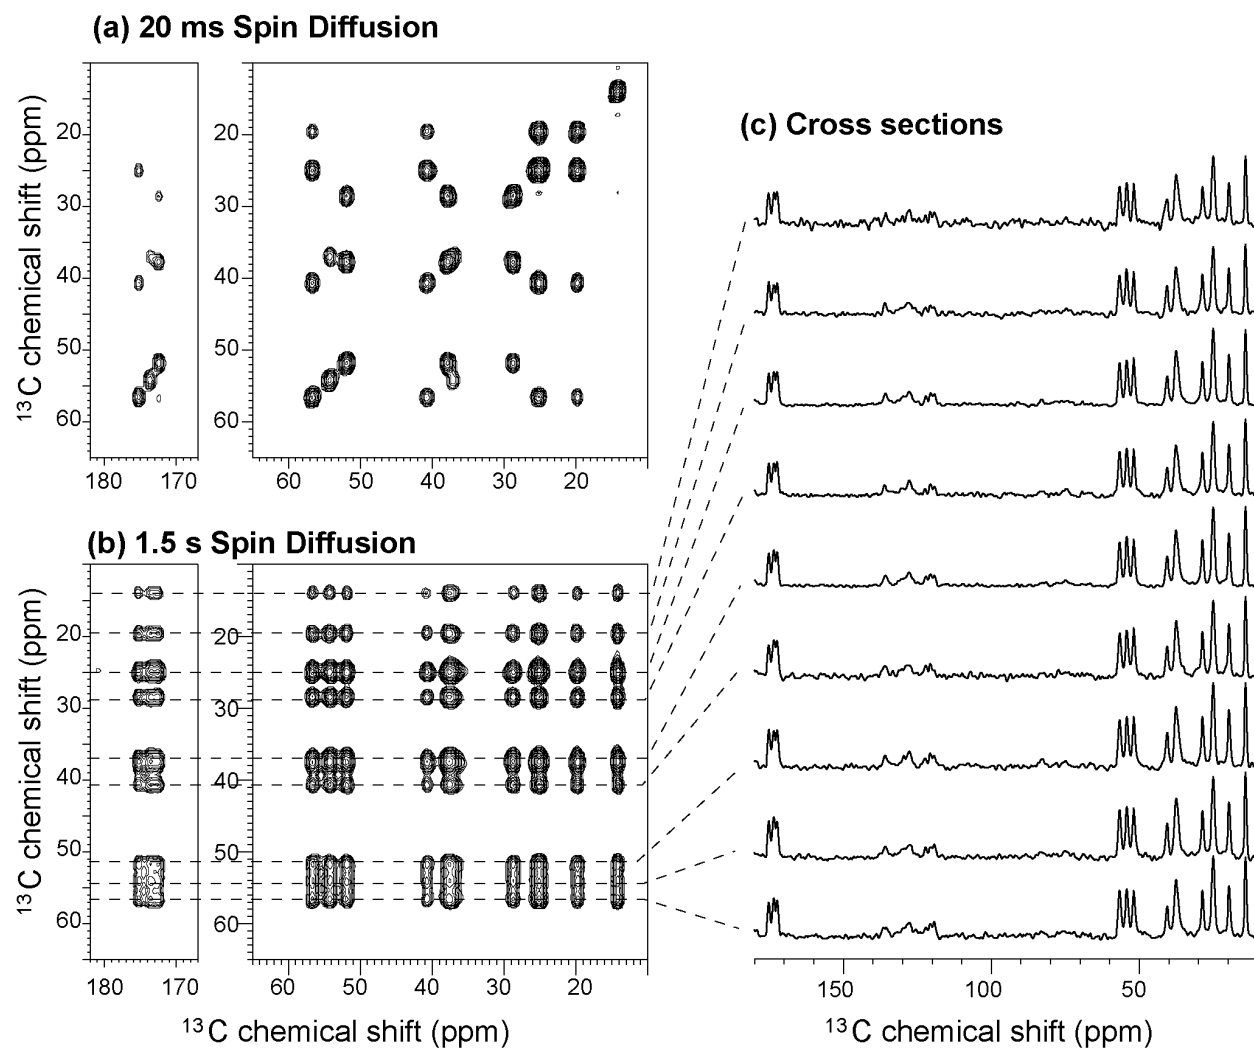

**Figure S6.** Complete equilibration of  $^{13}\text{C}$  magnetization of the tripeptide formyl-Met-Leu-Phe at long spin diffusion mixing times. (a) 20 ms 2D PDSD spectrum. (b) 1.5 s 2D PDSD spectrum. (c) Cross sections of the 1.5 s 2D spectrum show identical intensity patterns for all slices.
